# Supplementary material
Source: publisher site journal article supplement (https://www.dovepress.com/article/423129)
Supplement: Supplementary file 1 [file get_supplementary_file.php]

**Supplementary Materials**

**Appendix 1.** Two radiomics score calculation formulae.

HCC Rad_score = 0.37336917983785683 +0.004113 * A_exponential_glrlm_RunLengthNonUniformity +0.017295 * A_exponential_glrlm_RunVariance +0.053981 * A_exponential_glszm_GrayLevelNonUniformity +0.044310 * A_exponential_glszm_SizeZoneNonUniformity -0.001722 * A_lbp-3D-m1_glcm_Idn -0.025865 * A_original_glszm_SmallAreaEmphasis +0.012437 * A_wavelet-HHH_glszm_LargeAreaLowGrayLevelEmphasis -0.079957 * A_wavelet-LHH_glcm_Correlation +0.014014 * V_exponential_glcm_Idmn -0.037269 * V_exponential_glcm_Imc2 -0.017122 * V_exponential_gldm_DependenceEntropy -0.044525 * V_lbp-3D-k_glszm_GrayLevelVariance -0.044429 * V_original_shape_Sphericity +0.026178 * V_square_glcm_InverseVariance -0.038826 * V_wavelet-HHH_glszm_SmallAreaEmphasis

Spleen Rad_score= 0.3849136890254711 + 0.001290 * A_lbp-3D-m1_gldm_LowGrayLevelEmphasis -0.016495 * A_lbp-3D-m2_glrlm_RunEntropy -0.011315 * A_log-sigma-4-0-mm-3D_firstorder_90Percentile -0.052466 * A_square_glszm_SmallAreaEmphasis -0.047649 * A_wavelet-HLL_glcm_ClusterShade -0.006229 * V_lbp-3D-m1_glrlm_LongRunHighGrayLevelEmphasis +0.012729 * V_original_firstorder_Kurtosis -0.011927 * V_square_glszm_ZoneEntropy -0.002287 * V_wavelet-LHL_glszm_SmallAreaHighGrayLevelEmphasis


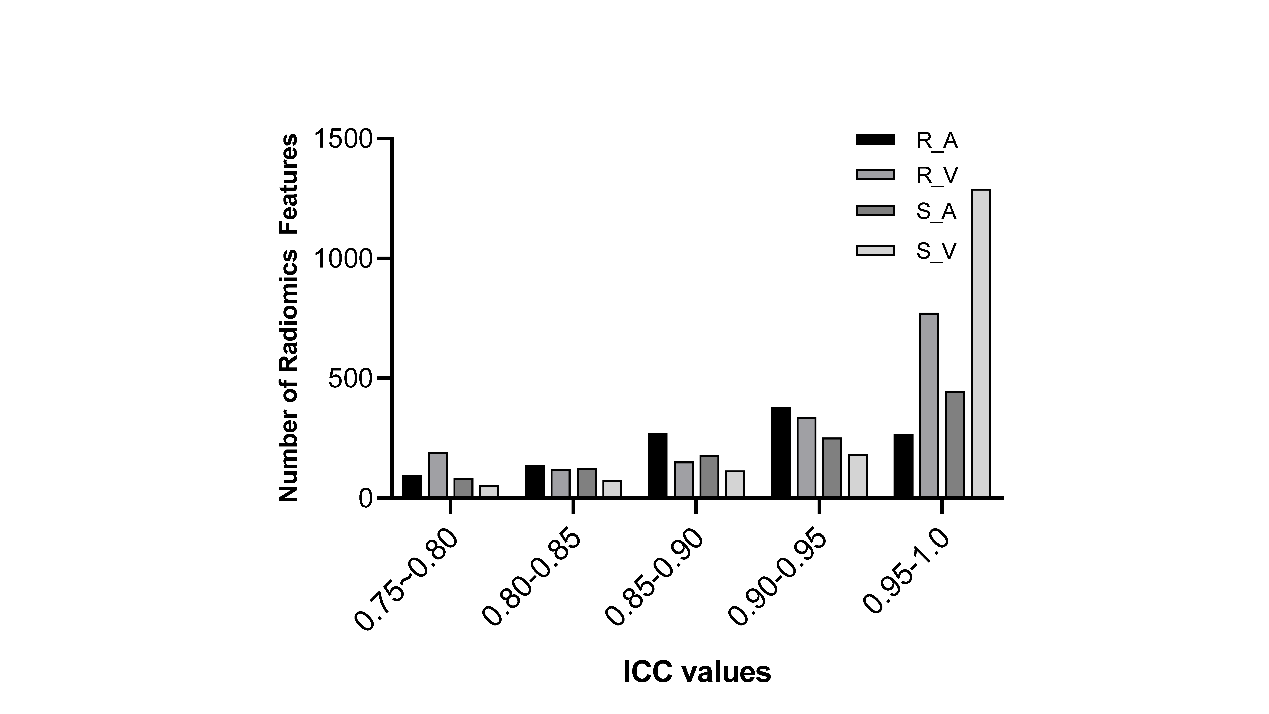


**Figure S1.** Reproducibility of radiomics features. Stable features with ICC over 0.75 were remained for subsequent analysis resulting in 640 first-order intensity features,499 shape features and 2673 high-order texture features.
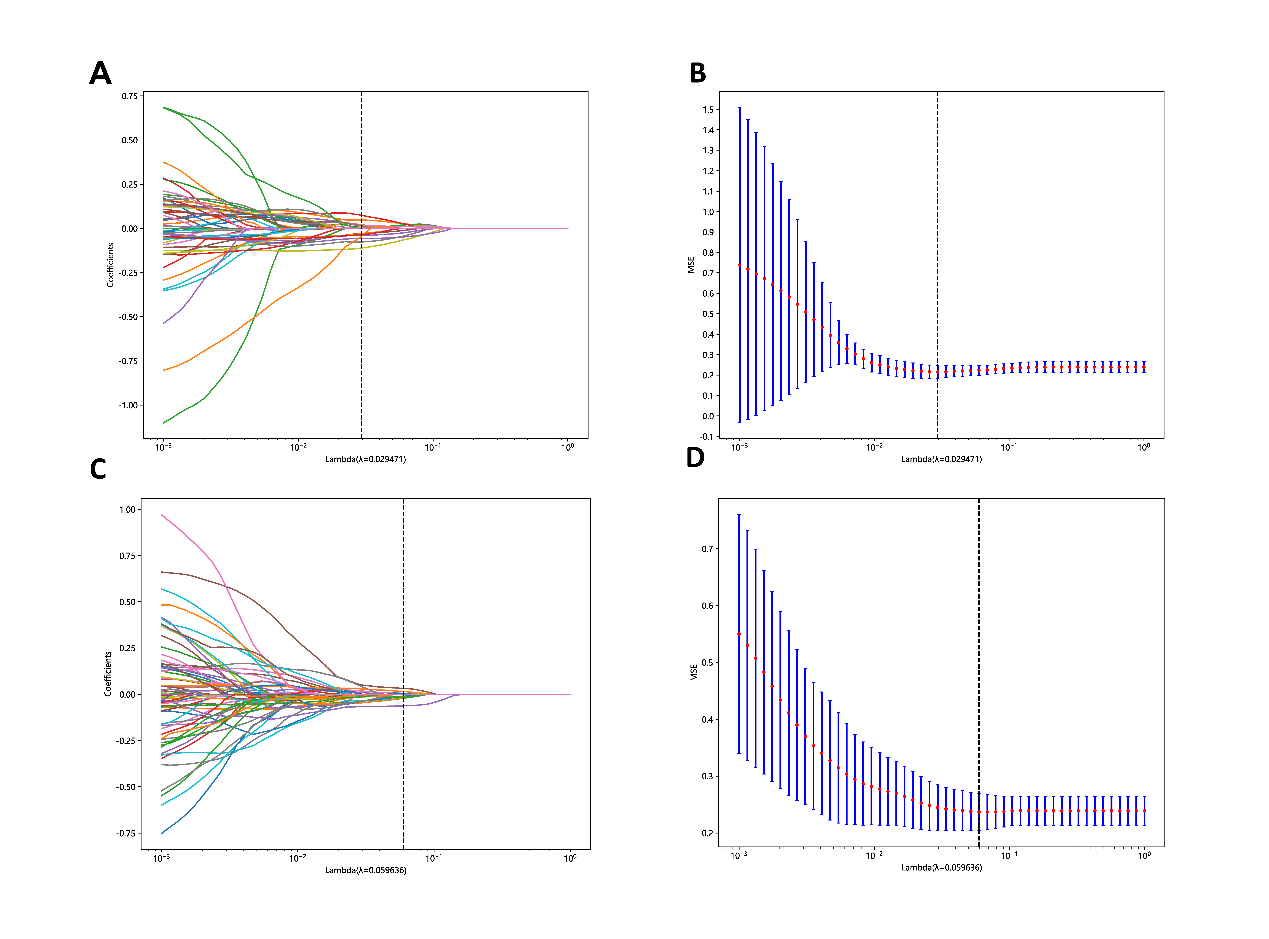


**Figure S2.** Two rad scores (HCC and spleen) were respectively constructed using LASSO cox regression analysis. LASSO cox regression analysis curtailed redundant features resulting in fifteen features of rad-score (HCC) (A, B), nine features of rad-score (spleen) (C, D).

| **Table S1.** Delong test for three radiomics models. | | | | | | |
| --- | --- | --- | --- | --- | --- | --- |
| Signature | Difference between areas | Standard Error | 95% Confidence Interval | z statistic | | Significance level |
| HCC verse Spleen | 0.0418 | 0.0631 | -0.0819 to 0.166 | 0.663 | | P = 0.5075 |
| HCC verse dual_region | 0.0736 | 0.0317 | 0.0115 to 0.136 | 2.323 | | P = 0.0202 |
| Spleen verse dual_region | 0.115 | 0.0385 | 0.0399 to 0.191 | 2.997 | | P = 0.0027 |
| **Table S2.** Classification and interpretation for radiomics features. | | | | | | |
| Radiomics Features | | | Classification | | Interpretation | |
| A_exponential_glrlm_RunLengthNonUniformity | | | GLRLM | | The nonuniformity of the running length of the Indexation gray level reflects the uneven distribution of the running length of different gray levels in the image | |
| A_exponential_glrlm_RunVariance | | | GLRLM | | Measurement of the variance in runs for the run lengths | |
| A_exponential_glszm_GrayLevelNonUniformity | | | GLSZM | | Measurement of the variability of gray-level intensity values in the image, with a lower value indicating more homogeneity in intensity values | |
| A_exponential_glszm_SizeZoneNonUniformity | | | GLSZM | | Measurement of the variability of size zone volumes in the image, with a lower value indicating more homogeneity in size zone volumes | |
| A_lbp-3D-m1_glcm_Idn | | | GLCM | | Another measure of the local homogeneity of an image | |
| A_lbp-3D-m1_gldm_LowGrayLevelEmphasis | | | GLDM | | Measures the distribution of low gray-level values, with a higher value indicating a greater concentration of low gray-level values in the image | |
| A_lbp-3D-m2_glrlm_RunEntropy | | | GLRLM | | Measures the uncertainty/randomness in the distribution of run lengths and gray levels | |
| A_log-sigma-4-0-mm-3D_firstorder_90Percentile | | | First Order Features | | The 90th percentile of X (a set of Np voxels included in the ROI) | |
| A_original_glszm_SmallAreaEmphasis | | | GLSZM | | Measurement of the distribution of small size zones, with a greater value indicative of more smaller size zones and more fine textures | |
| A_square_glszm_SmallAreaEmphasis | | | GLSZM | | Measurement of the distribution of small size zones, with a greater value indicative of more smaller size zones and more fine textures | |
| A_wavelet-HHH_glszm_LargeAreaLowGrayLevelEmphasis | | | GLSZM | | Measurement of the proportion in the image of the joint distribution of larger size zones with lower gray-level values | |
| A_wavelet-HLL_glcm_ClusterShade | | | GLCM | | Measurement of the skewness and uniformity of the GLCM | |
| A_wavelet-LHH_glcm_Correlation | | | GLCM | | Value between 0 (uncorrelated) and 1 (perfectly correlated) showing the linear dependency of gray level values to their respective voxels in the GLCM | |
| V_exponential_glcm_Idmn | | | GLCM | | Measurement of the local homogeneity of an image | |
| V_exponential_glcm_Imc2 | | | GLCM | | Assesses the correlation between the probability distributions of i and j (quantifying the complexity of the texture) approaching 1 | |
| V_exponential_gldm_DependenceEntropy | | | GLDM | | Indexation gray level depends on entropy, which measures the complexity of gray level dependency between pixels in an image | |
| V_lbp-3D-k_glszm_GrayLevelVariance | | | GLSZM | | Measurement of the variance in gray level intensity for the runs | |
| V_lbp-3D-m1_glrlm_LongRunHighGrayLevelEmphasis | | | GLRLM | | Measurement of the joint distribution of long run lengths with higher gray-level values. | |
| V_original_firstorder_Kurtosis | | | First Order Features | | Measurement of the ‘peakedness’ of the distribution of values in the image ROI | |
| V_original_shape_Sphericity | | | Shape Features (3D) | | Measurement of the roundness of the shape of the tumor region relative to a sphere | |
| V_square_glcm_InverseVariance | | | GLCM | | Method of aggregating two or more random variables to minimize the variance of the weighted average | |
| V_square_glszm_ZoneEntropy | | | GLSZM | | Measurement of the uncertainty/randomness in the distribution of zone sizes and gray levels. | |
| V_wavelet-HHH_glszm_SmallAreaEmphasis | | | GLSZM | | The degree of emphasis on small regions in the HHH subband after wavelet transform | |
| V_wavelet-LHL_glszm_SmallAreaHighGrayLevelEmphasis | | | GLSZM | | Measurement of the proportion in the image of the joint distribution of smaller size zones with higher gray-level values. | |
| The feature classification and interpretation are extracted from pyradiomics documentation[1].  Abbreviation: A, Arterial phase; V, Venous phase; GLCM, Gray Level Co-occurrence Matrix; GLDM, Gray Level Dependence Matrix; GLRLM, Gray Level Run Length Matrix; GLSZM, Gray Level Size Zone Matrix; ROI, region of interest. | | | | | | |

**Reference**

[1] van Griethuysen JJM, Fedorov A, Parmar C, Hosny A, Aucoin N, Narayan V, et al. Computational Radiomics System to Decode the Radiographic Phenotype. Cancer Res. 2017;77(21):e104-e7.
